# Supplementary material for: Health System Response during the European Refugee Crisis: Policy and Practice Analysis in Four Italian Regions
Source: MDPI journal article supplement (doi:10.3390/ijerph17155458), 2020-07-29
Supplement: s1 [file s1]

**Table S4 - Policy analysis: data collection**

|                                                                      | Emilia-Romagna                                                                                                                                                                                                                                                                                                                                                                           | Lazio                                                                                                                                                                                         | Toscana                                                                                                                                                                               | Veneto                                                                                                                                                                                                                                                                            |
|----------------------------------------------------------------------|------------------------------------------------------------------------------------------------------------------------------------------------------------------------------------------------------------------------------------------------------------------------------------------------------------------------------------------------------------------------------------------|-----------------------------------------------------------------------------------------------------------------------------------------------------------------------------------------------|---------------------------------------------------------------------------------------------------------------------------------------------------------------------------------------|-----------------------------------------------------------------------------------------------------------------------------------------------------------------------------------------------------------------------------------------------------------------------------------|
| <b>Continuative and computer migrant-sensitive collection system</b> | <p>Provision of regional computer system for health facilities involved in migrant and AS health care [58,60];</p> <p>Provision of data collection of first ME and health care through checklist on regional computer system [57-58,60];</p> <p>Collection of ASs' data about access to health care through specific new variables and inclusion in ordinary data system [57-58,60];</p> | <p>Use of a defined checklist/ protocol for ME [74-77];</p>                                                                                                                                   | <p>Computerization of the first ME [85];</p> <p>Use of a specific checklist for the ME [85];</p>                                                                                      | Not present;                                                                                                                                                                                                                                                                      |
| <b>Typology of data</b>                                              | <p>Provision and monitoring of data of first ME and health care for ASs [58,60];</p> <p>Identification of each AS by a personal code [57-58,60];</p> <p>Inclusion of ASs in epidemiological surveillance by LHOs [57-58,60];</p>                                                                                                                                                         | <p>Data collection and monitoring of first ME and health care of ASs [74-77];</p> <p>Data disaggregated [74-77];</p> <p>Inclusion of ASs by LHOs in epidemiological surveillance [74-77];</p> | <p>Data collection and monitoring of first ME and health care of ASs [85];</p> <p>Inclusion of ASs in epidemiological surveillance and regional health report [85, 92];</p>           | <p>Collection of data regarding vaccinations performed, type and batch of vaccine and potential adverse events, both for children and adults [93-95];</p> <p>Updating of the documentation certifying the vaccination status with a personal vaccination certificate [93-95];</p> |
| <b>Portability/transmissibility</b>                                  | Personal health records follow ASs movement [57-58,60];                                                                                                                                                                                                                                                                                                                                  | Not present;                                                                                                                                                                                  | Not present;                                                                                                                                                                          | Not present;                                                                                                                                                                                                                                                                      |
| <b>Report/aim of collection</b>                                      | Production by RHA of a periodic report of activities and transmission of information to all the stakeholders involved in ASs' assistance [48,57-58,60];                                                                                                                                                                                                                                  | Not present;                                                                                                                                                                                  | <p>Collection and production of data for syndromic surveillance [85];</p> <p>Observation, monitoring, analysis to recognize health status and specific health needs [79, 80, 86];</p> | Not present;                                                                                                                                                                                                                                                                      |

Note: ASs = Asylum seekers; LHOs = Local health organizations; ME = Medical examination; RHA = Regional health authorities;
