# Supplementary material for: Health System Response during the European Refugee Crisis: Policy and Practice Analysis in Four Italian Regions
Source: MDPI journal article supplement (doi:10.3390/ijerph17155458), 2020-07-29
Supplement: s1 [file s1]

**Table S7. Policy analysis: part of health system targeted**

|                                                               | Emilia-Romagna                                                                                                                                                                                                                                                                                  | Lazio                                                                                                                                                                                                                                                                                                 | Toscana                                                                                                                                                                                                                                                                                                                                                                                                                                                  | Veneto                                                                                                                                                                                                                                                  |
|---------------------------------------------------------------|-------------------------------------------------------------------------------------------------------------------------------------------------------------------------------------------------------------------------------------------------------------------------------------------------|-------------------------------------------------------------------------------------------------------------------------------------------------------------------------------------------------------------------------------------------------------------------------------------------------------|----------------------------------------------------------------------------------------------------------------------------------------------------------------------------------------------------------------------------------------------------------------------------------------------------------------------------------------------------------------------------------------------------------------------------------------------------------|---------------------------------------------------------------------------------------------------------------------------------------------------------------------------------------------------------------------------------------------------------|
| <b>Overcome barriers in access to care</b>                    | <p>Presence of cultural mediation services by LHOs [48,57-58,60];</p> <p>Exemption from charge after formal asylum request for 6 months, renewable until the entitlement to RHS [56-58,60];</p> <p>Guarantee of access to regional health insurance after formal asylum request [56-58,60];</p> | <p>Presence of cultural mediation services by LHOs [62-69,74-77];</p> <p>Exemption from charge after formal asylum request for 6 months, renewable until the entitlement to RHS [62-69,73-77];</p> <p>Guarantee of access to regional health insurance after formal asylum request [62-69,73-77];</p> | <p>Presence of cultural mediation services by LHOs [78-80, 83];</p> <p>Exemption from charge for 12 months for ASs, as unoccupied; Before the regularization, exemption from charge, following the national law [87-91];</p> <p>Health entitlements and support in navigating through the system [78-80, 83];</p> <p>Information measures to facilitate access to healthcare towards irregular migrants to improve knowledge and access [78-80, 83];</p> | <p>Presence of cultural mediation services by LHOs [100];</p>                                                                                                                                                                                           |
| <b>Comprehensive primary health care and health promotion</b> | <p>Guarantee by LHOs of health protection and early access to care; Right to access for ASs to RHS as well as host community [51-58,60];</p> <p>Definition of dedicated services of LHOs to provide essential services to migrants and ASs [48];</p>                                            | <p>Guarantee by LHOs of health protection and early access to care; Right to access for ASs to RHS as well as host community [62-69,73-77];</p> <p>Definition of dedicated services of LHOs to provide essential services to migrants and ASs [76];</p>                                               | <p>Guarantee by LHOs of health protection and early access to care; Right to access for ASs to RHS as well as host community [80-84, 89, 90];</p>                                                                                                                                                                                                                                                                                                        | <p>Guarantee by LHOs of health protection and early access to care; Right to access for ASs to RHS as well as host community [93-95,97];</p> <p>Definition of dedicated services of LHOs to provide essential services to migrants and ASs [93-95];</p> |
| <b>Monitoring and governance</b>                              | <p>RHA must produce a periodic report of activities and information should be transmitted to all the stakeholders involved in the ASs assistance [48,58];</p> <p>Annual Report of health status and access to care of migrant and AS is provided by epidemiological regional center [48];</p>   | <p>RHA make up a regional government point in collaboration with the NGOs local forum [62-63];</p>                                                                                                                                                                                                    | <p>Production of regional report on migrants' health status to recognize migrants' health needs [80-87];</p> <p>Regional service (Global health center - CSG) as coordination structure for health cooperation and migrants' health [83, 84];</p> <p>Coordination with LHOs but also with</p>                                                                                                                                                            | <p>Not present;</p> <p>Annual Report of health status and access to care [96];</p> <p>Local Authorities predisposes and coordinate local integration plans and coordination taskforce [93-95];</p>                                                      |

|                                                                                                       |                                                                                                                                                                                                                                                                                                  |                                                                                                                                                                                     |                                                                                                                                                                                                              |                                                                                                                                                                                                                 |
|-------------------------------------------------------------------------------------------------------|--------------------------------------------------------------------------------------------------------------------------------------------------------------------------------------------------------------------------------------------------------------------------------------------------|-------------------------------------------------------------------------------------------------------------------------------------------------------------------------------------|--------------------------------------------------------------------------------------------------------------------------------------------------------------------------------------------------------------|-----------------------------------------------------------------------------------------------------------------------------------------------------------------------------------------------------------------|
|                                                                                                       | <p>LHOs must collect specific accountability for healthcare provided to AS [58];</p> <p>Provision of healthcare and assistance in coordination and cooperation with other institutional stakeholders and NGOs to guarantee health protection and address Social determinants of health [48];</p> |                                                                                                                                                                                     | <p>epidemiological regional center (ARS), other regional institutions, associations, volunteering aiming at sharing information, projects, actions and to produce an annual report [79, 80, 83, 84, 92];</p> |                                                                                                                                                                                                                 |
| <p><b>Continuous training, guidance, and support to implement migrant sensitive interventions</b></p> | <p>HCWs must be skilled on medicine of migration and health [57-58,60];</p> <p>Guidance, training, and support tools must be provided by LHOs to all HCWs [56];</p>                                                                                                                              | <p>Skilled HCWs on migrant health/continuous professional training [62-63, 74-77];</p> <p>Guidance, training, and support tools must be provided by LHOs to all HCW [62-63,73];</p> | <p>Provision of specific education and skills for HCWs and development of cultural competencies within health services [79, 80, 83, 84, 92];</p>                                                             | <p>Technical group for “initiatives in migrant health care” must provide training and technical support to HCWs of LHO [93-95];</p> <p>Guidance and support for acceptance center hygienic standards [100];</p> |

Note: ASs = Asylum seekers; HCW = Health workers; LHO = Local health organizations; NGO = Non-governmental organizations; RHA = Regional health authorities; RHS = Regional Health service;
