# Supplementary material for: Health System Response during the European Refugee Crisis: Policy and Practice Analysis in Four Italian Regions
Source: MDPI journal article supplement (doi:10.3390/ijerph17155458), 2020-07-29
Supplement: s1 [file s1]

**Table S6. Policy analysis: health issue addressed**

|                                                                                         | Emilia-Romagna                                                                                                                                                                                                                                                                                                                                   | Lazio                                                                                                                                                                                                                                                         | Toscana                                                                                                                                                                                                                                                 | Veneto                                                                                                                                                                                                                                                                                                                |
|-----------------------------------------------------------------------------------------|--------------------------------------------------------------------------------------------------------------------------------------------------------------------------------------------------------------------------------------------------------------------------------------------------------------------------------------------------|---------------------------------------------------------------------------------------------------------------------------------------------------------------------------------------------------------------------------------------------------------------|---------------------------------------------------------------------------------------------------------------------------------------------------------------------------------------------------------------------------------------------------------|-----------------------------------------------------------------------------------------------------------------------------------------------------------------------------------------------------------------------------------------------------------------------------------------------------------------------|
| <b>Screening, treatment and follow up for CDs</b>                                       | ME at arrival [57-58,60];<br>Screening and eventual treatment for TB, TSD, parasitosis, pediculosis, scabies, during first acceptance; [57-58,60]<br>Screening and possible treatment for LTBI during second acceptance [57-58,60-61];<br>Access to essential and emergency care, diagnosis, treatment and follow up must be guaranteed [57-60]; | ME at arrival [74-77];<br>Screening and possible treatment for TB, parasitosis, during first acceptance [74-77];<br><br>Access to essential and emergency care, diagnosis, treatment and follow up must be guaranteed [62-63,74-77];                          | ME at arrival [85];<br>Inclusion in general population screening when entitled [83, 86, 87];                                                                                                                                                            | ME at arrival [100];<br>Screening and possible treatment for TB, scabies, and Polio during first acceptance [100];<br>Screening and eventual treatment for LTBI during second acceptance [100];<br><br>Access to essential and emergency care, diagnosis, treatment and follow up must be guaranteed [93-95, 98-100]; |
| <b>Immunization</b>                                                                     | Child and adult vaccination in accordance with the applicable law within the framework of general vaccine campaign [57-61];                                                                                                                                                                                                                      | Child and adult vaccination in accordance with the applicable law within the framework of general vaccine campaign [62-63,71-72, 74-77];                                                                                                                      | Child and adult vaccination in accordance with the applicable law within the framework of general vaccine campaign [83, 86, 87];                                                                                                                        | Child and adult vaccination in accordance with the applicable law within the framework of general vaccine campaign [93-95, 98-100];                                                                                                                                                                                   |
| <b>Screening, treatment and follow up for NCDs</b>                                      | First ME: complete clinical evaluation and active research of previous and novel conditions; Blood test and urine test if needed [57-58,60];<br><br>Guarantee of access to essential and emergency care, diagnosis, treatment and follow up [57-60];                                                                                             | First ME: complete clinical evaluation and active research of previous and novel conditions; Blood test and urine test if needed [74-77];<br><br>Guarantee of access to essential and emergency care, diagnosis, treatment and follow up [62-63,71-72,74-77]; | First ME: complete clinical evaluation and active research of previous and novel conditions; Blood test and urine test if needed [85];<br><br>Guarantee of access to essential and emergency care, diagnosis, treatment and follow up [80, 81, 86, 87]; | Not present                                                                                                                                                                                                                                                                                                           |
| <b>Multidisciplinary diagnostic-therapeutic-rehabilitation path for vulnerabilities</b> | Provision by LHOs of access for prevention, treatment, and rehabilitation for drug abuse [58];                                                                                                                                                                                                                                                   | Not present;                                                                                                                                                                                                                                                  | Not present;                                                                                                                                                                                                                                            | Not present;                                                                                                                                                                                                                                                                                                          |
| <b>Maternal and child health (MCH)</b>                                                  | Protection of pregnancy and maternity with the equal rights of Italian citizens [48,57-60];<br><br>Conduction of Screening for pregnancy                                                                                                                                                                                                         | Protection of pregnancy and maternity with the equal rights of Italian citizens [62-63,71-72, 74-77];                                                                                                                                                         | Protection of pregnancy and maternity with the equal rights of Italian citizens [80, 81, 86, 87];<br><br>Entitlement to the NHS for all the children at                                                                                                 | Entitlement for minors to all scheduled vaccination [98-100];                                                                                                                                                                                                                                                         |

|                                                                        |                                                                                           |              |                                         |              |
|------------------------------------------------------------------------|-------------------------------------------------------------------------------------------|--------------|-----------------------------------------|--------------|
|                                                                        | during first ME [57-58,60];<br>Identification of MCH units for migrants in each LHO [48]; |              | arrival in the region [80, 81, 86, 87]; |              |
| <b>Counselling,<br/>health<br/>education,<br/>health<br/>promotion</b> | Not present;                                                                              | Not present; | Not present;                            | Not present; |

Note: CDs = Communicable diseases; LHO = Local health organization; LTBI = Latent tuberculosis infection; ME = Medical examination; MCH = Maternal and child health; NCDs= Non-communicable diseases; NHS = National health service; STD = Sexual transmitted diseases; TB = Tuberculosis;
