# Supplementary material for: Health System Response during the European Refugee Crisis: Policy and Practice Analysis in Four Italian Regions
Source: MDPI journal article supplement (doi:10.3390/ijerph17155458), 2020-07-29
Supplement: s1 [file s1]

**Table S3. Regional policies analyzed.**

|                         | Emilia-Romagna                                                                                                                                                                                                                                                                                                                                                                                                                                                                                                                                                                                                                                                                                                | Lazio                                                                                                                                                                                                                                                                                                                                                                                                                                                                                                                                                                                                                                                                                                                                                                                                                                                                                                                       | Toscana                                                                                                                                                                                                                                                                                                                                                                                                                                                                                                                                                                                                                                                                                                                                                                                                                                                                           | Veneto                                                                                                                                                                                                                                                                                       |
|-------------------------|---------------------------------------------------------------------------------------------------------------------------------------------------------------------------------------------------------------------------------------------------------------------------------------------------------------------------------------------------------------------------------------------------------------------------------------------------------------------------------------------------------------------------------------------------------------------------------------------------------------------------------------------------------------------------------------------------------------|-----------------------------------------------------------------------------------------------------------------------------------------------------------------------------------------------------------------------------------------------------------------------------------------------------------------------------------------------------------------------------------------------------------------------------------------------------------------------------------------------------------------------------------------------------------------------------------------------------------------------------------------------------------------------------------------------------------------------------------------------------------------------------------------------------------------------------------------------------------------------------------------------------------------------------|-----------------------------------------------------------------------------------------------------------------------------------------------------------------------------------------------------------------------------------------------------------------------------------------------------------------------------------------------------------------------------------------------------------------------------------------------------------------------------------------------------------------------------------------------------------------------------------------------------------------------------------------------------------------------------------------------------------------------------------------------------------------------------------------------------------------------------------------------------------------------------------|----------------------------------------------------------------------------------------------------------------------------------------------------------------------------------------------------------------------------------------------------------------------------------------------|
| <b>Laws, Decree</b>     | <p>Law 5/2004 of 24th March 2004, norms for integration of immigrants [48];</p> <p>Decree, Regularization of immigrant caregivers [49];</p> <p>Decree, Elderly immigrants' enrolment in Regional Health Service [50];</p> <p>Decree, Health protection of children of undocumented migrants [51];</p> <p>Decree, Access to primary health care for children of undocumented migrants [52];</p> <p>Decree, Healthcare for minors and their caregivers [53];</p> <p>Decree, Healthcare coverage exemption for minors coming from Ukraine, Belarus, and Saharawi [54];</p> <p>Decree, Agreement between RHS and medical syndicate for the access to primary healthcare for minors and their caregivers [55];</p> | <p>Law 10/2008 of 25th May 2008, norms for the promotion and the protection of immigrant' rights [62];</p> <p>Decree, transposition of Government-Regions Agreement on immigrant's healthcare [63];</p> <p>Decree, enrolment in Regional Health Service of refugees and asylum seekers [64];</p> <p>Decree, mandatory enrolment in Regional Health Service of refugees (including humanitarian asylum seekers [65];</p> <p>Decree, health care for asylum seekers [66];</p> <p>Decree, enrolment in Regional Health Service of refugees and asylum seekers [67];</p> <p>Decree, enrolment in Regional health services of refugees and asylum seekers coming from other regions [68];</p> <p>Decree, annual enrolment in Regional Health Service of refugees and asylum seekers [69];</p> <p>Decree, monitoring the implementation of the transposition of Government-Regions Agreement on immigrants' health care [70];</p> | <p>Law 40/2005 of 24th February 2005, norms for Regional Health Service [78];</p> <p>Law 41/2005 of 24th February 2005, Integrated system of interventions and services for the protection of social citizenship rights [79];</p> <p>Law 29/ 2009 of 9th June 2009, norms for the accommodation, the integration, and the protection of foreign citizens [80];</p> <p>Decree, transposition of Government-Regions Agreement on immigrants' health care [81];</p> <p>Decree, extra-UE elderly immigrants' enrolment in Regional Health Service [82];</p> <p>Law 84/2015 of 28th December 2015, norms for RHS, modifications to law 40/2005 [83];</p> <p>Decree, n. 1304 of 27th November 2017. Norms concerning international protection and regional immigration plan [84];</p> <p>Decree, DGRT n.1000 of the 10th September of 2018. Protocols for migrant health care [85];</p> | <p>Law 55/1982 of 15th December of 1982, norms for social care [93];</p> <p>Law 9/1990 of 30th January 1990, norms concerning immigration [94];</p> <p>Law 1/2012 of 17th April 2012, statute of Veneto [95];</p> <p>Decree, Regional observatory of immigration [96];</p>                   |
| <b>Plans, protocols</b> | <p>Protocols, healthcare coverage exemption [56];</p> <p>Indications for Local Health Organizations for migrant health care [57];</p> <p>Indications to Local Health Organizations for migrant health care national program [58];</p> <p>2017-2019 Regional Social and Health plan [59];</p> <p>Indications to Local Health Organizations for migrant</p>                                                                                                                                                                                                                                                                                                                                                     | <p>2008-2010 Regional Health Plan [71];</p> <p>2010-2012 Regional Health Plan [72];</p> <p>Guidelines, access to care for extra-UE immigrants [73];</p> <p>Indications, health care of migrants arrived by sea and hosted in regional facilities [74];</p> <p>Indications, health care of migrants arrived by</p>                                                                                                                                                                                                                                                                                                                                                                                                                                                                                                                                                                                                           | <p>Guidelines, access to care for foreign citizens [86];</p> <p>Guidelines, access to care for foreign citizens. Notes [87];</p> <p>Protocols, healthcare coverage exemption for unaccompanied minors [88];</p> <p>Protocols, healthcare coverage exemption [89];</p> <p>Protocols, healthcare coverage exemption for</p>                                                                                                                                                                                                                                                                                                                                                                                                                                                                                                                                                         | <p>Guidelines, access to care for foreign citizens [97];</p> <p>2012-2016 Regional Social and Health plan [98];</p> <p>2014-2018 Regional plan for preventive care [99];</p> <p>Protocols for infectious disease prevention and control related to the large influx of immigrants [100];</p> |

|  |                                                                                                                                                                                  |                                                                                                                                                                         |                                                                                                                                                    |  |
|--|----------------------------------------------------------------------------------------------------------------------------------------------------------------------------------|-------------------------------------------------------------------------------------------------------------------------------------------------------------------------|----------------------------------------------------------------------------------------------------------------------------------------------------|--|
|  | healthcare national program [60];<br>Indications to Local Health Organizations for migrant healthcare. Immunization program and LTBI screening on accommodation facilities [61]; | sea in transit through the region [75];<br>Indications of regional hub for healthcare of displaced migrants [76];<br>Indications of healthcare for asylum seekers [77]; | unaccompanied minors [90];<br>Protocols, healthcare coverage exemption for asylum seekers [91];<br>2018-2020 Regional Social and Health plan [92]; |  |
|--|----------------------------------------------------------------------------------------------------------------------------------------------------------------------------------|-------------------------------------------------------------------------------------------------------------------------------------------------------------------------|----------------------------------------------------------------------------------------------------------------------------------------------------|--|
