# Supplementary material for: Health System Response during the European Refugee Crisis: Policy and Practice Analysis in Four Italian Regions
Source: MDPI journal article supplement (doi:10.3390/ijerph17155458), 2020-07-29
Supplement: s1 [file s1]

**Table S5. Policy analysis: population groups**

|                                              | <b>Emilia-Romagna</b>                                                                             | <b>Lazio</b>                                                                             | <b>Toscana</b>                                                                                                                                              | <b>Veneto</b>                                                                            |
|----------------------------------------------|---------------------------------------------------------------------------------------------------|------------------------------------------------------------------------------------------|-------------------------------------------------------------------------------------------------------------------------------------------------------------|------------------------------------------------------------------------------------------|
| <b>UASC and adolescents</b>                  | Entitlement to the NHS for all the children at arrival in the region [48,51-55,57-58,60];         | Entitlement to the NHS for all the children at arrival in the region [62-69];            | Entitlement to the NHS for all the children at arrival in the region.<br>Rights to entitlement to NHS also for irregular migrants' sons [78-81, 86-88, 90]; | Entitlement to the NHS for all the children at arrival in the region [93-95];            |
| <b>Maternity</b>                             | Protection of pregnancy and maternity with the equal rights of Italian citizens [48,51-55,57-60]; | Protection of pregnancy and maternity with the equal rights of Italian citizens [62-69]; | Protection of pregnancy and maternity with the equal rights of Italian citizens [78-81, 86, 87];                                                            | Protection of pregnancy and maternity with the equal rights of Italian citizens [93-95]; |
| <b>Elderly</b>                               | Entitlement to the NHS for elderly immigrants [50];                                               | Not present;                                                                             | Entitlement to the NHS for elderly immigrants [82];                                                                                                         | Not present;                                                                             |
| <b>People with disabilities</b>              | Not present;                                                                                      | Not present;                                                                             | Not present;                                                                                                                                                | Not present;                                                                             |
| <b>People with mental issue</b>              | Health protection for people with mental issue [59];                                              | Not present;                                                                             | Not present;                                                                                                                                                | Not present;                                                                             |
| <b>Victims of violence (any) and torture</b> | Health protection for victims of violence [59];                                                   | Not present;                                                                             | Not present;                                                                                                                                                | Not present;                                                                             |

Note: NHS = National Health Services; UASC = Unaccompanied and separated children;
