# Supplementary material for: Health System Response during the European Refugee Crisis: Policy and Practice Analysis in Four Italian Regions
Source: MDPI journal article supplement (doi:10.3390/ijerph17155458), 2020-07-29
Supplement: s1 [file s1]

**Table S1 - Checklist used for semi-structured interview**

| Items                                           | Notes                                                                  |
|-------------------------------------------------|------------------------------------------------------------------------|
| Area                                            | City/Local health organization                                         |
| Health workers involved for the data collection | Role in the healthcare services                                        |
| Iter → care pathway                             | Describing reception system, actors, and roles                         |
| First medical examination (ME)                  | When, Who, Where, Why, What                                            |
| Screening                                       | When, Who, Where, Why, What                                            |
| Immunizations' program                          | When, Who, Where, Why, What                                            |
| Health records                                  | Individual health records and data transmission                        |
| Access to healthcare                            | Fees, entitlement, other specific modality, or admission to the system |
| Continuity of care after the first ME           | When, Who, Where, Why, What                                            |
| Challenges, critical issues, suggestions        | Open                                                                   |
