# Supplementary material for: Health System Response during the European Refugee Crisis: Policy and Practice Analysis in Four Italian Regions
Source: Int J Environ Res Public Health. 2020 Jul 29;17(15):5458. doi: 10.3390/ijerph17155458 (PMC7432017; doi:10.3390/ijerph17155458)
Supplement: Supplementary file 1 [file ijerph-17-05458-s001.zip]

Archive with 8 entries (7 files):
- untitled folder/
- untitled folder/Table S1.pdf
- untitled folder/Table S2.pdf
- untitled folder/Table S3.pdf
- untitled folder/Table S4.pdf
- untitled folder/Table S5.pdf
- untitled folder/Table S6.pdf
- untitled folder/Table S7.pdf
